# Supplementary material for: 3,6-Di(pyridin-2-yl)-1,2,4,5-tetrazine (pytz) mediated metal-free mild oxidation of thiols to disulfides in aqueous medium
Source: Royal Society of Chemistry journal article supplement (doi:10.1039/c6ra01509c), 2016-01-01

**Electronic Supporting Information**

**3, 6-Di(pyridin-2-yl)-1,2,4,5-tetrazine (pytz) mediated metal-free mild  
oxidation of thiols to disulfides in aqueous medium**

Suwendu Samanta, Shounak Ray, Abhisek Brata Ghosh and Papu Biswas

Department of Chemistry, Indian Institute of Engineering Science and Technology, Shibpur,  
Howrah, India, 711 103. E-mail: papubiswas\_besus@yahoo.com.

**Table S1** Crystallographic data of compound **2t** and **H<sub>2</sub>pytz**

|                                             | <b>Compound 2t</b>                                                               | <b>H<sub>2</sub>pytz</b>                                                         |
|---------------------------------------------|----------------------------------------------------------------------------------|----------------------------------------------------------------------------------|
| Empirical formula                           | C <sub>12</sub> H <sub>16</sub> N <sub>2</sub> S <sub>4</sub>                    | C <sub>12</sub> H <sub>10</sub> N <sub>6</sub>                                   |
| Formula weight                              | 316.51                                                                           | 238.26                                                                           |
| <i>T</i> /K                                 | 150(2)                                                                           | 120(2)                                                                           |
| Crystal system                              | Monoclinic                                                                       | Triclinic                                                                        |
| Space group                                 | <i>P</i> 2(1)/n                                                                  | P-1                                                                              |
| <i>a</i> /Å                                 | 12.0283 (13)                                                                     | 8.1982(6)                                                                        |
| <i>b</i> /Å                                 | 8.2692 (9)                                                                       | 8.2816(6)                                                                        |
| <i>c</i> /Å                                 | 14.3216 (15)                                                                     | 8.8622(6)                                                                        |
| $\alpha$ /°                                 | 90                                                                               | 102.040(2)                                                                       |
| $\beta$ /°                                  | 102.017 (2)                                                                      | 111.9550(10)                                                                     |
| $\gamma$ /°                                 | 90                                                                               | 90.162(2)                                                                        |
| <i>Z</i>                                    | 4                                                                                | 2                                                                                |
| <i>V</i> / Å <sup>3</sup>                   | 1393.3 (3)                                                                       | 543.61(7)                                                                        |
| <i>D</i> calcd/ g cm <sup>-3</sup>          | 1.509                                                                            | 1.456                                                                            |
| $\mu$ / mm <sup>-1</sup>                    | 0.665                                                                            | 0.096                                                                            |
| <i>F</i> (000)                              | 664                                                                              | 248                                                                              |
| Crystal size/ mm <sup>3</sup>               | 0.34×0.24×0.07                                                                   | 0.42×0.30×0.22                                                                   |
| Reflections collected                       | 6151                                                                             | 6902                                                                             |
| Independent reflections                     | 2624                                                                             | 2116                                                                             |
| parameters /Restraints                      | 163/0                                                                            | 180/0                                                                            |
| Goodness-of-fit , <i>S</i> <sup>a</sup>     | 1.118                                                                            | 1.030                                                                            |
| Final R indices [ <i>I</i> >2σ( <i>I</i> )] | <i>R</i> 1 <sup>a</sup> = 0.0319<br><i>wR</i> <sub>2</sub> <sup>b</sup> = 0.0890 | <i>R</i> 1 <sup>a</sup> = 0.0327<br><i>wR</i> <sub>2</sub> <sup>b</sup> = 0.0931 |
| R indices (all data)                        | <i>R</i> 1 <sup>a</sup> = 0.0355<br><i>wR</i> <sub>2</sub> <sup>b</sup> = 0.1007 | <i>R</i> 1 <sup>a</sup> = 0.0342<br><i>wR</i> <sub>2</sub> <sup>b</sup> = 0.0945 |

<sup>a</sup>*S* = [Σw(*F*<sub>o</sub><sup>2</sup>−*F*<sub>c</sub><sup>2</sup>)/(*N*−*P*)]<sup>1/2</sup> where *N* is the number of data and *P* the total number of parameters refined. <sup>b</sup>*R*<sub>1</sub>(*F*) = Σ||*F*<sub>o</sub>|−|*F*<sub>c</sub>||Σ|*F*<sub>o</sub>|.  
<sup>c</sup>*wR*<sub>2</sub>(*F*<sup>2</sup>) = [Σw(*F*<sub>o</sub><sup>2</sup>−*F*<sub>c</sub><sup>2</sup>)<sup>2</sup>/Σw(*F*<sub>o</sub><sup>2</sup>)<sup>2</sup>]<sup>1/2</sup>.

**Table S2** Selected Bond distances (Å) and Bond Angles (°) for 2-aminocyclopent-1-enecarbothioic dithioperoxyanhydride (**2t**)

| <b>2t</b> |            |
|-----------|------------|
| S2–S3     | 2.0112(7)  |
| S1–C6     | 1.671(2)   |
| S2–C6     | 1.8069(19) |
| S3–C7     | 1.793(2)   |
| S4–C7     | 1.669(2)   |
| N1–C1     | 1.319(3)   |
| N2–C12    | 1.321(3)   |
| C6–S2–S3  | 107.28(7)  |
| C7–S3–S2  | 106.41(7)  |

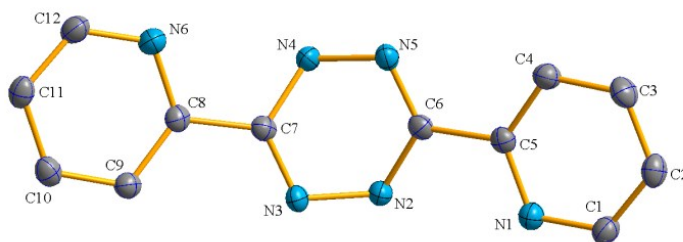

**Fig. S1** ORTEP representation of the 3, 6-di(pyridin-2-yl)-1,4-dihydro-1,2,4,5-tetrazine (**H<sub>2</sub>pytz**) showing 50% probability displacement ellipsoids. Hydrogen atoms are omitted for clarity.

**Oxidation of 3,6-di(pyridin-2-yl)-1,4-dihydro-1,2,4,5-tetrazine (H<sub>2</sub>pytz) to 3,6-Di(pyridin-2-yl)-1,2,4,5-tetrazine (Pytz)**

The H<sub>2</sub>pytz (0.48 g, 2 mmol) was dissolved in hot ethanol (50 ml) and excess sodium nitrite (0.69g, 10 mmol) in 5 ml water was added to this solution followed by drop wise addition of 2% aqueous hydrochloric acid until the solution reached approximately pH 3 under stirring condition. The solution turned red and 3,6-di(pyridin-2-yl)-1,2,4,5-tetrazine slowly crystallized upon cooling of the solution to room temperature. The product was filtered off and washed with water followed by ethanol. Yellow solid, yield (214 mg, 60%), mp: 193-194 °C, FT-IR (KBr,  $\nu_{\max}/\text{cm}^{-1}$ ): 3336 w, 3323 s, 3298 w, 3059 w, 1590 m, 1566 m, 1472 m, 1445 s, 1385 s, 1287 m, 1252 w, 1155 w, 1113 m, 993 m, 882 m, 785 s, 744 s, 679 m. <sup>1</sup>H NMR  $\delta_{\text{H}}$  (300 MHz, CDCl<sub>3</sub>): 8.573 (t, 4H,  $J = 8.0$  Hz), 8.052 (d, 2H,  $J = 8.0$  Hz), 7.762–7.728 (m, 2H), 7.338 (dd, 2H,  $J = 8.0$  Hz). <sup>13</sup>C NMR (75 MHz, CDCl<sub>3</sub>):  $\delta$  148.60, 147.69, 146.85, 139.92, 125.06, 121.52. HRMS (ESI-TOF):  $m/z$  261.1530 (M+Na<sup>+</sup>).

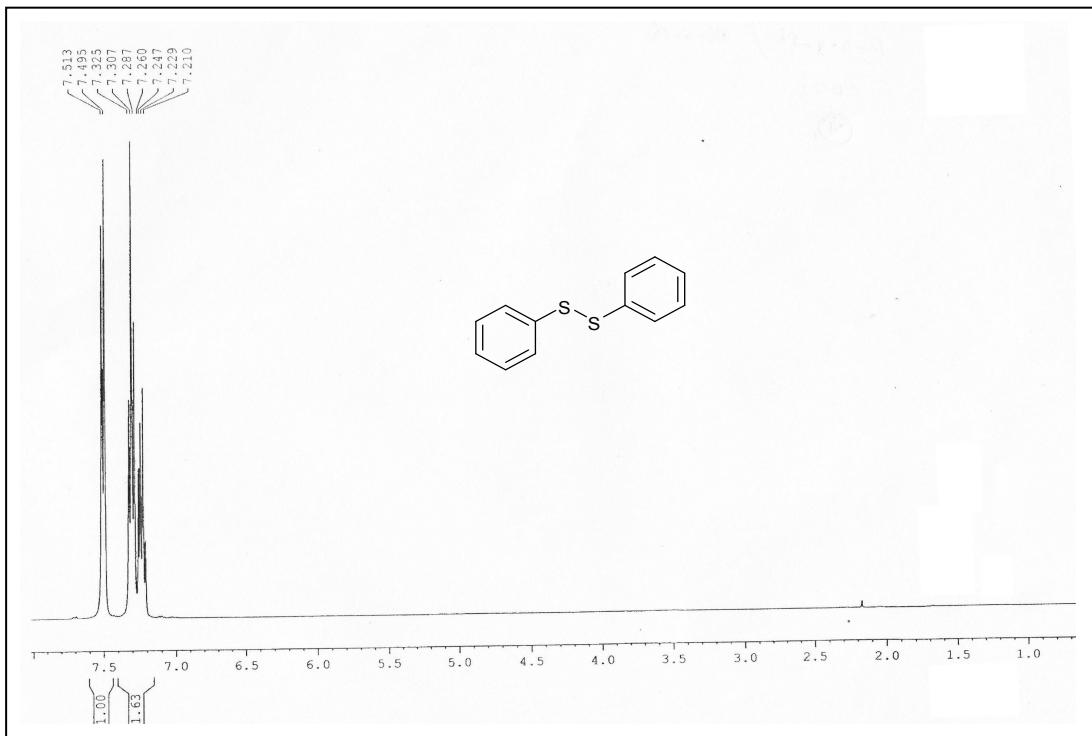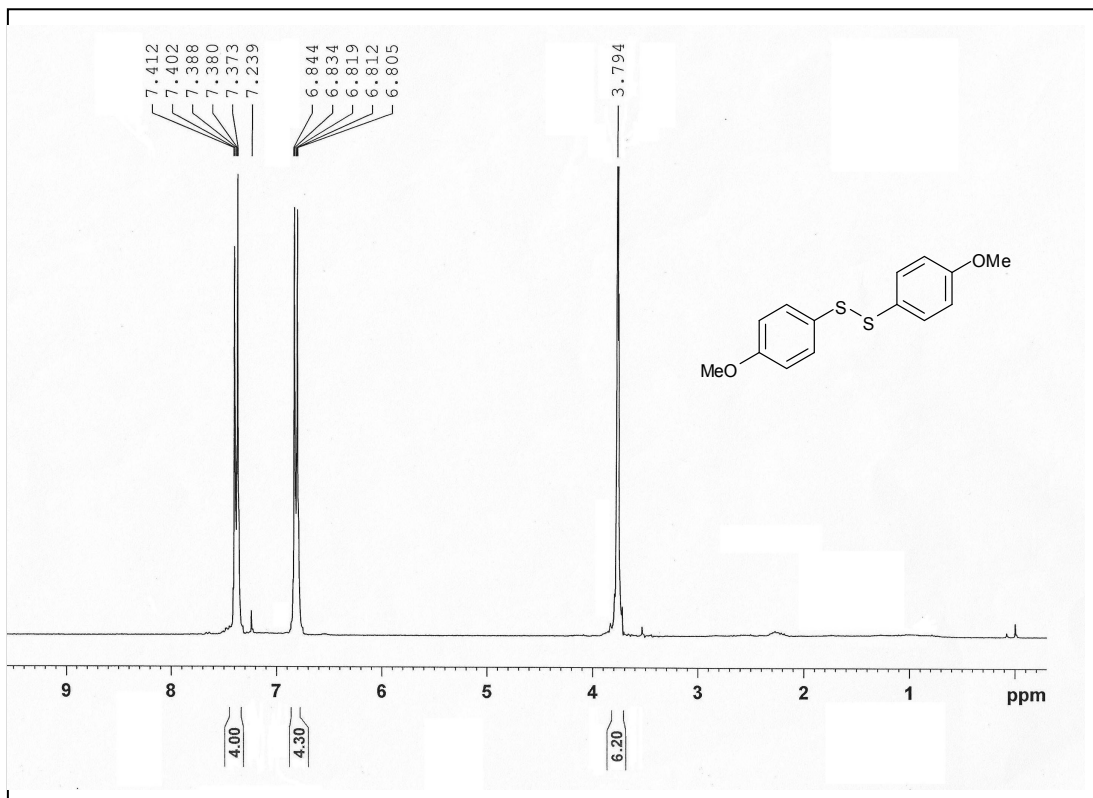

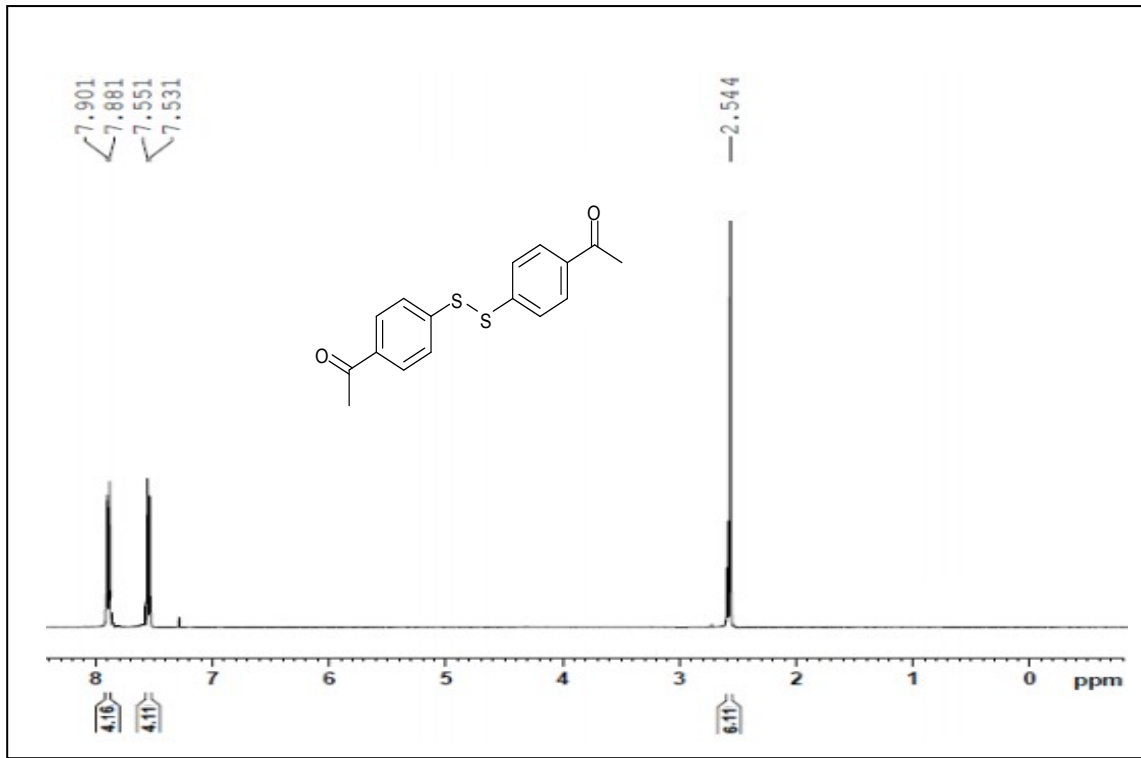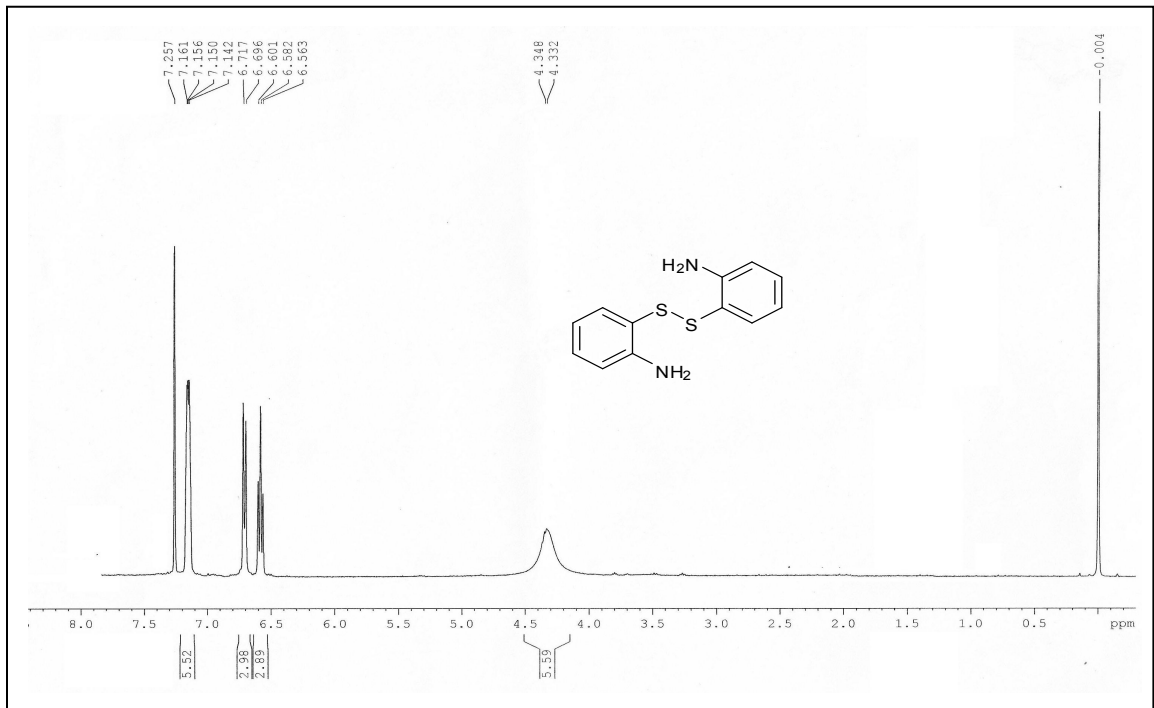

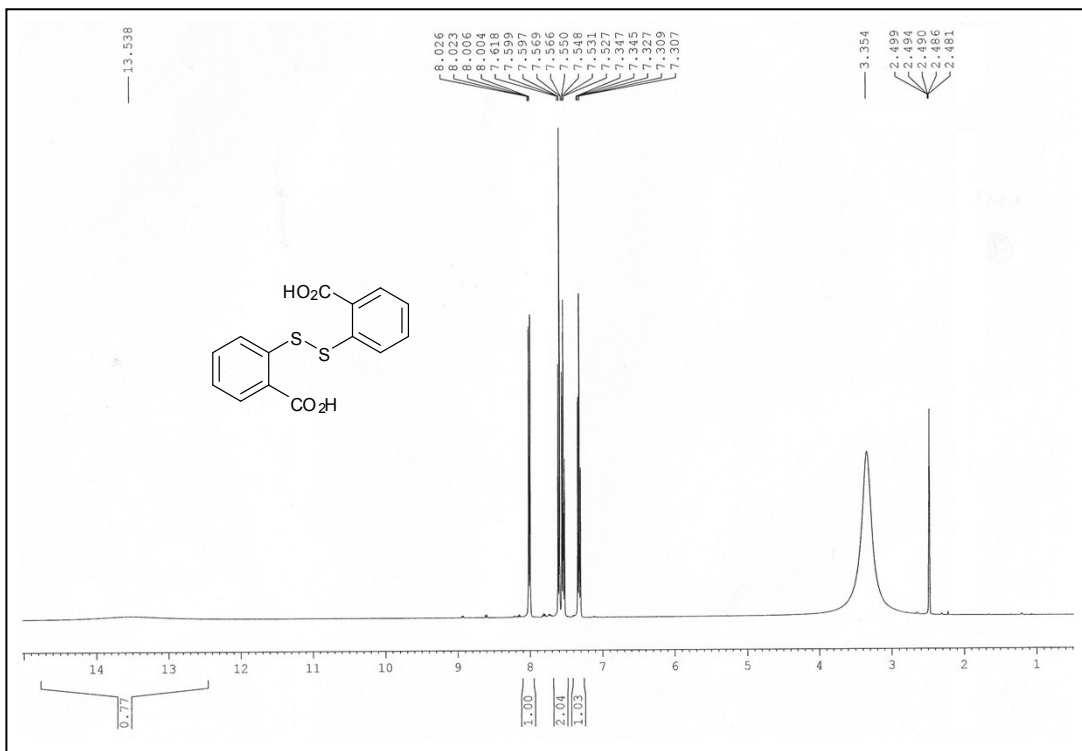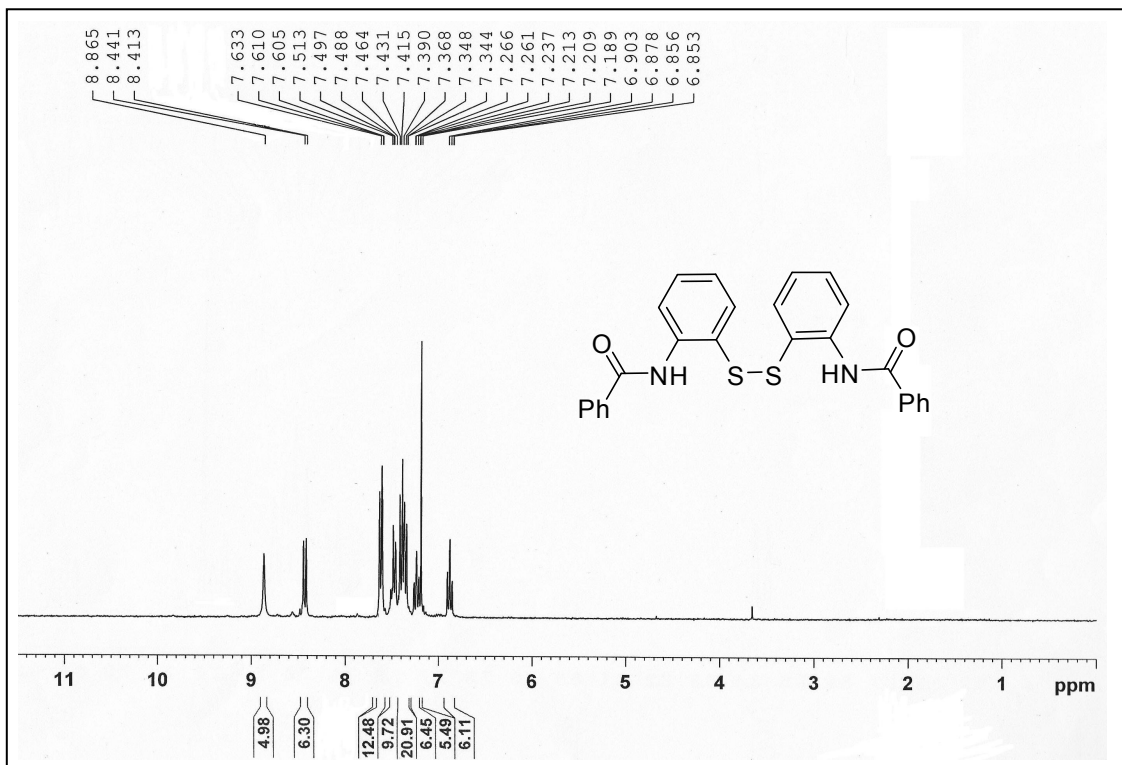

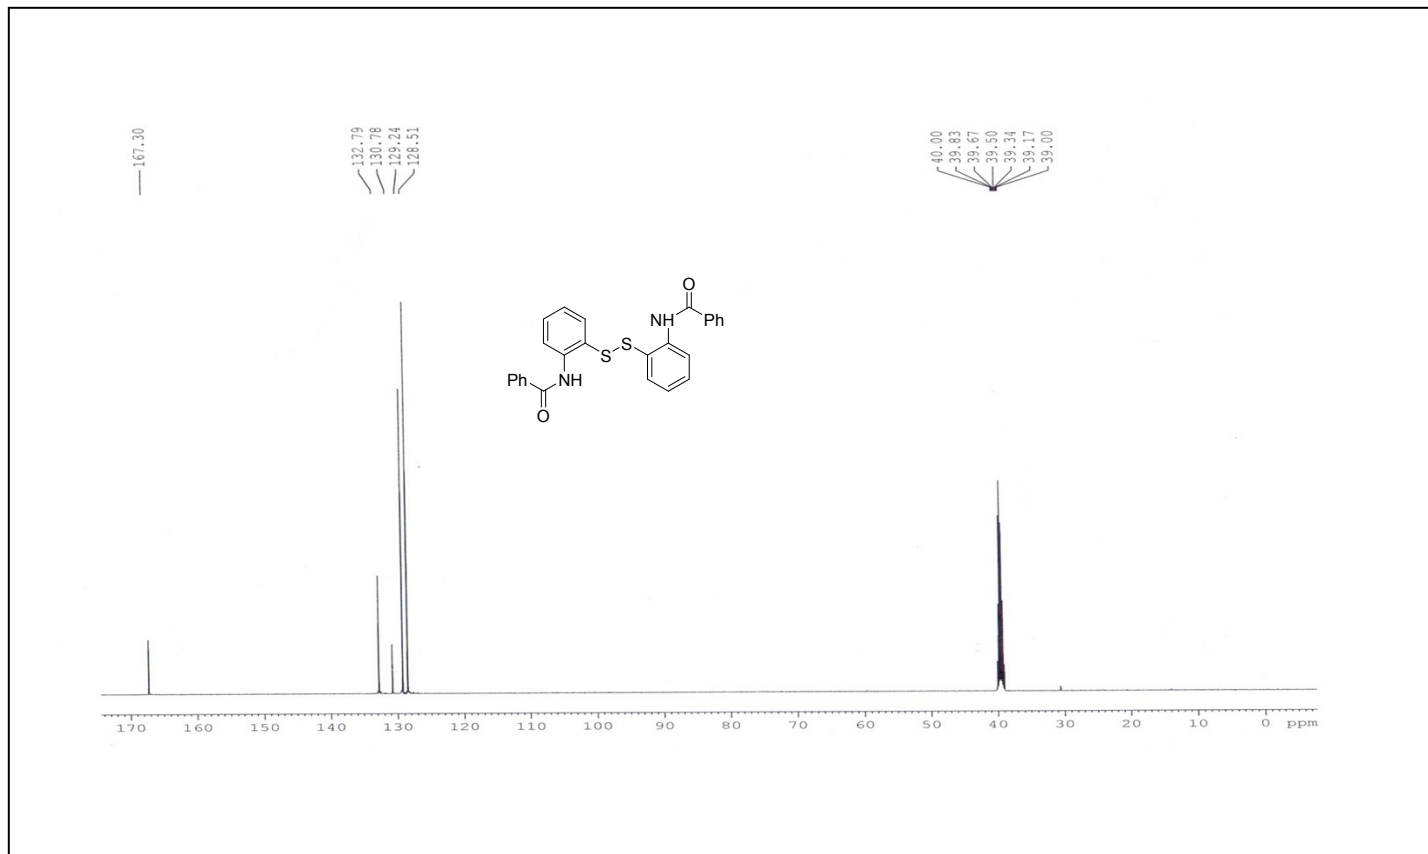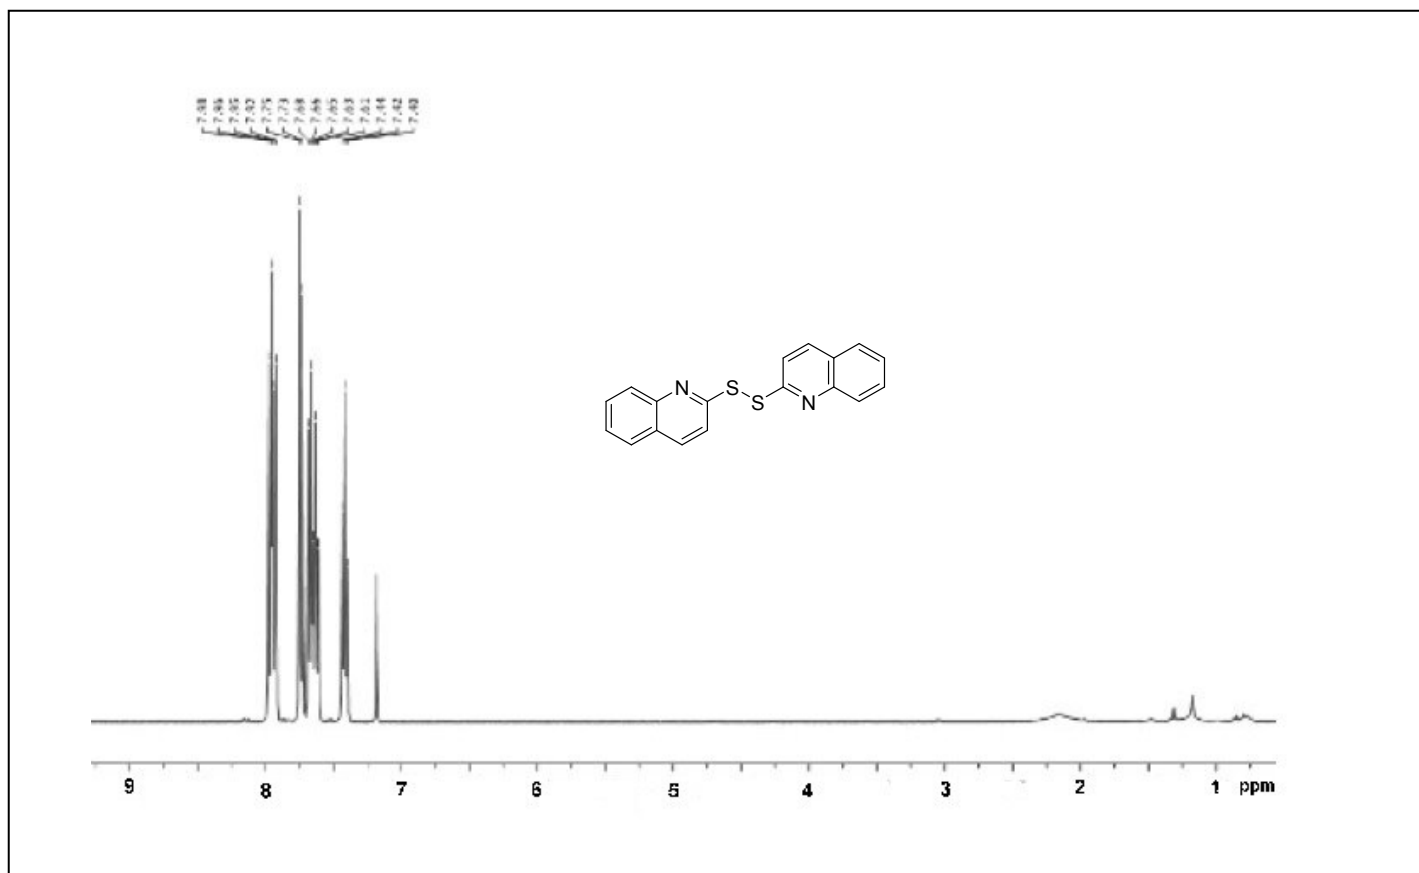



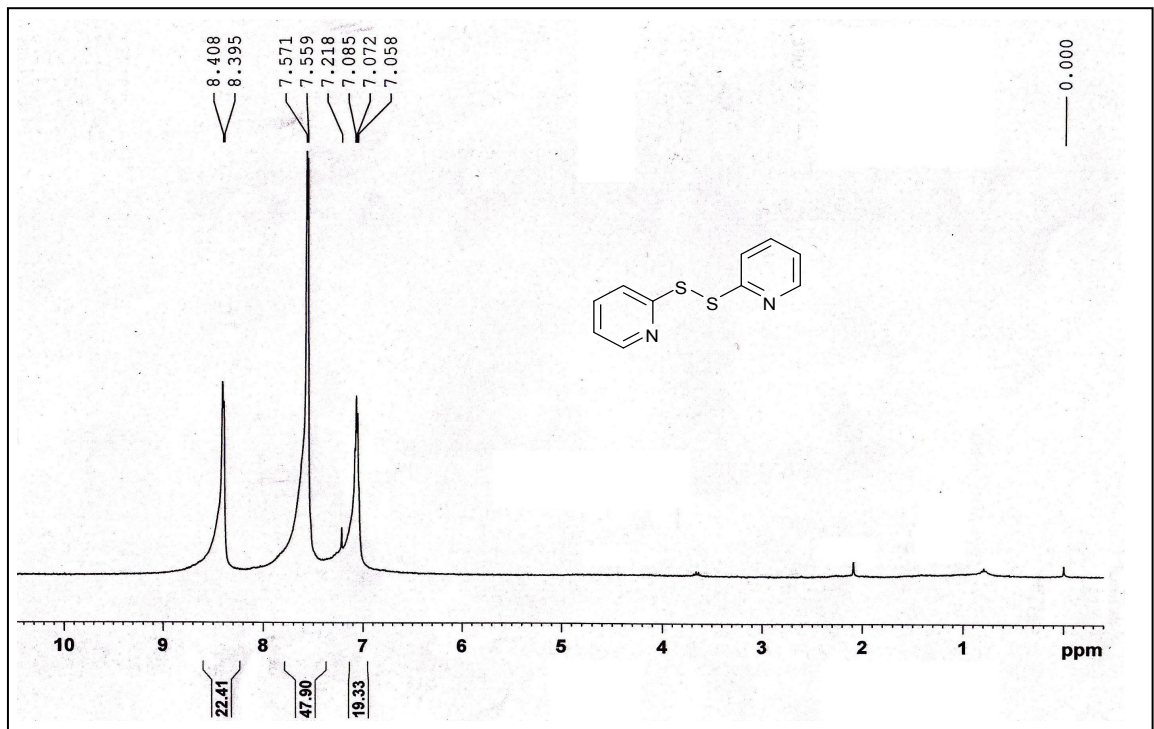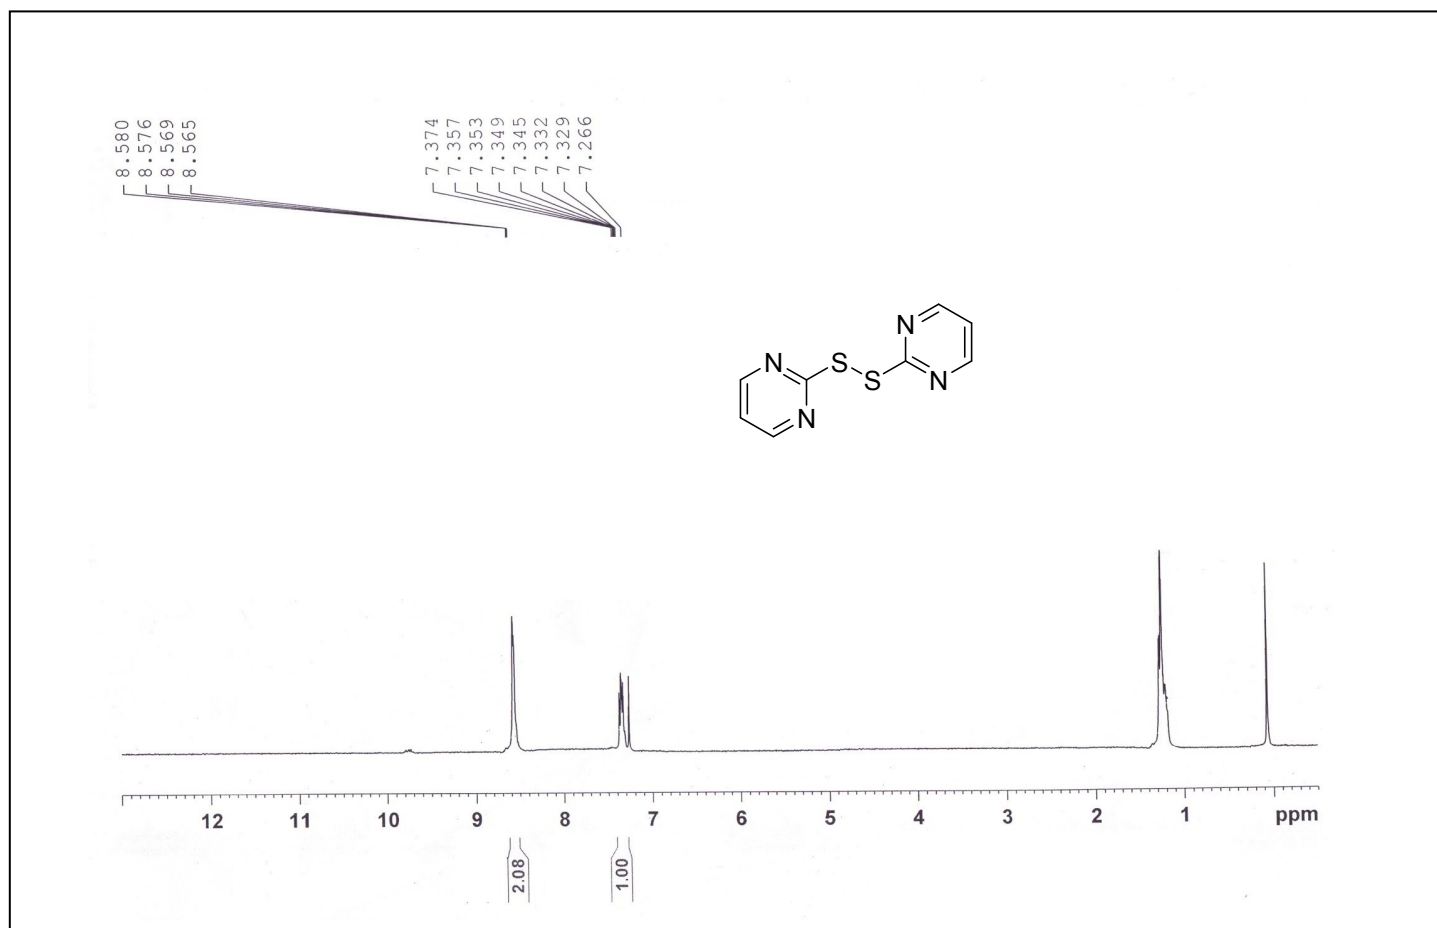

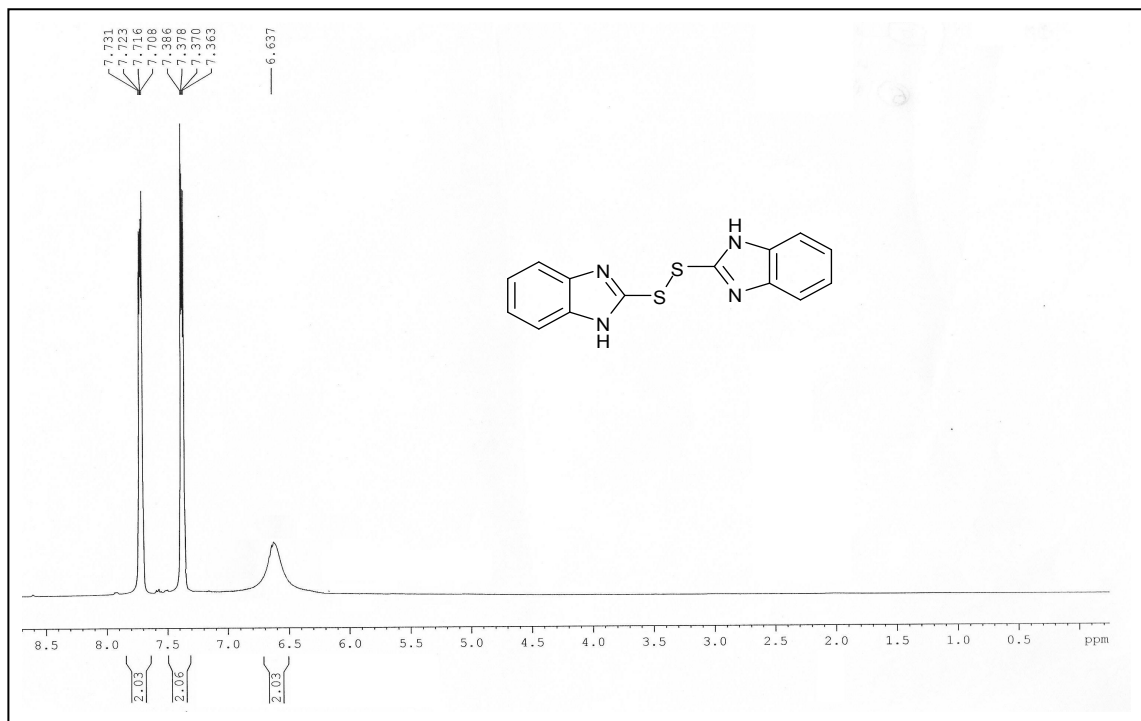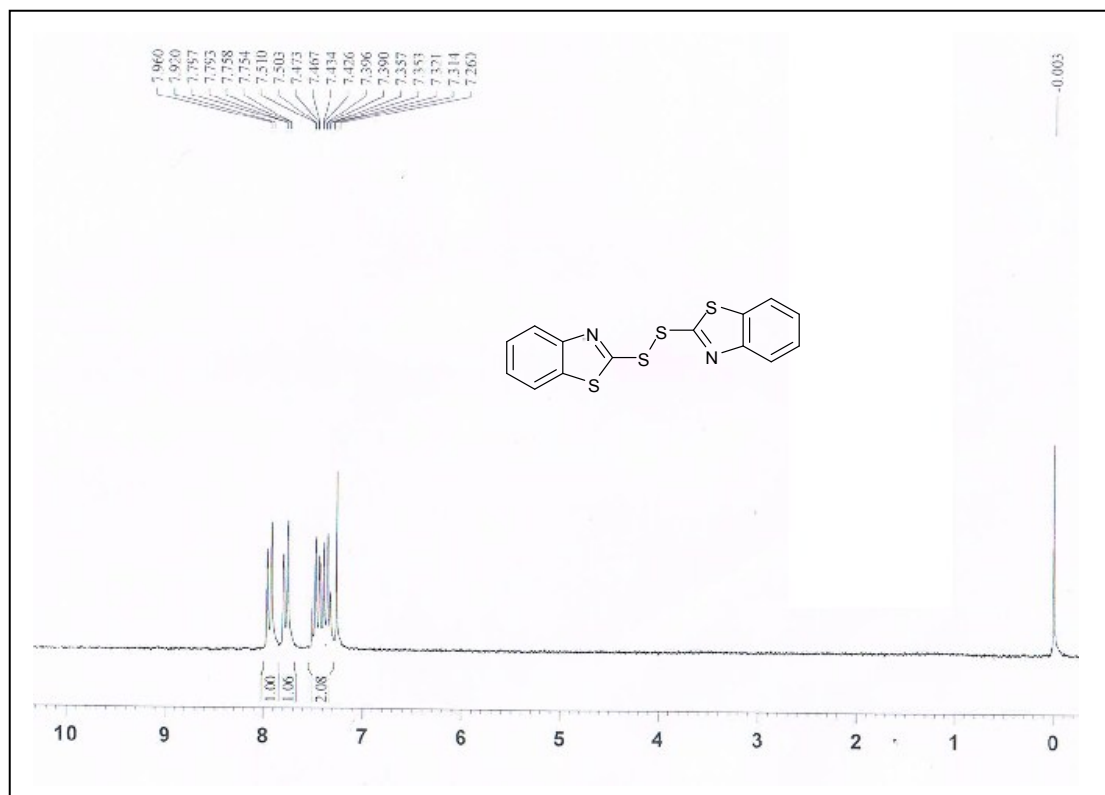

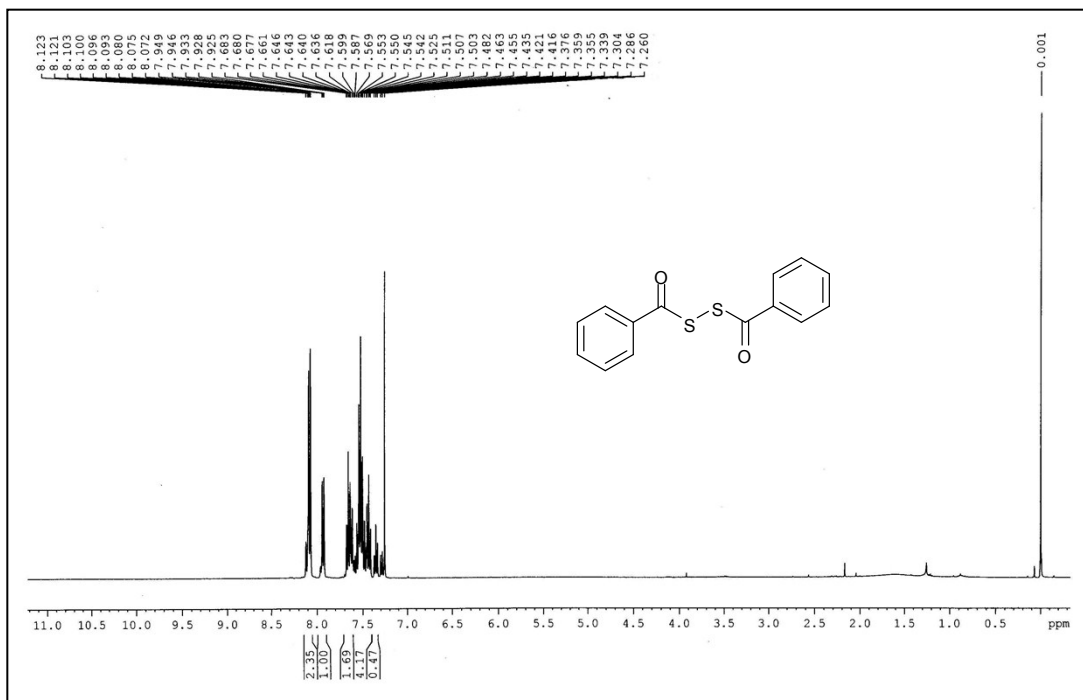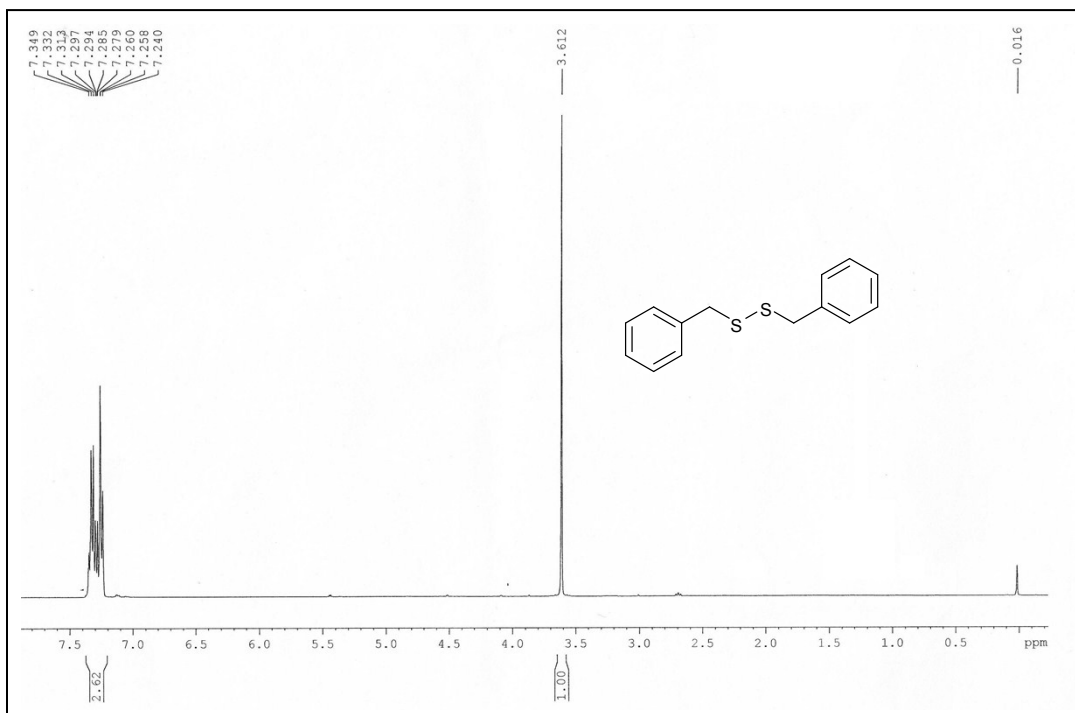

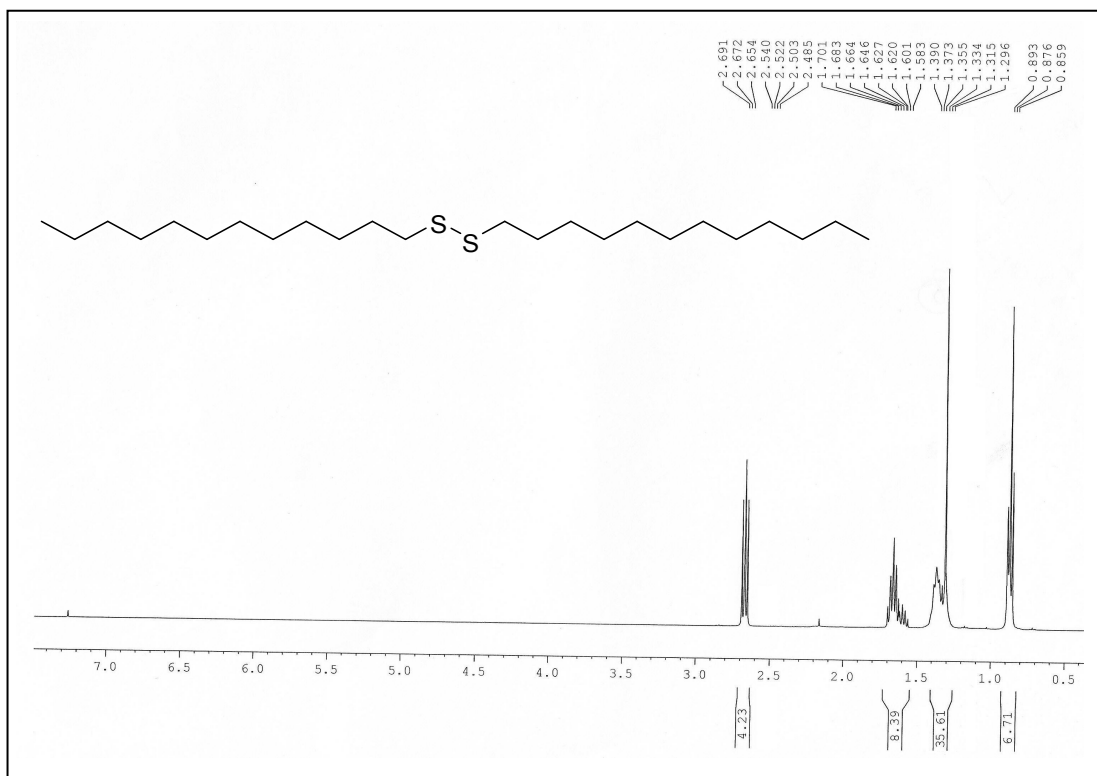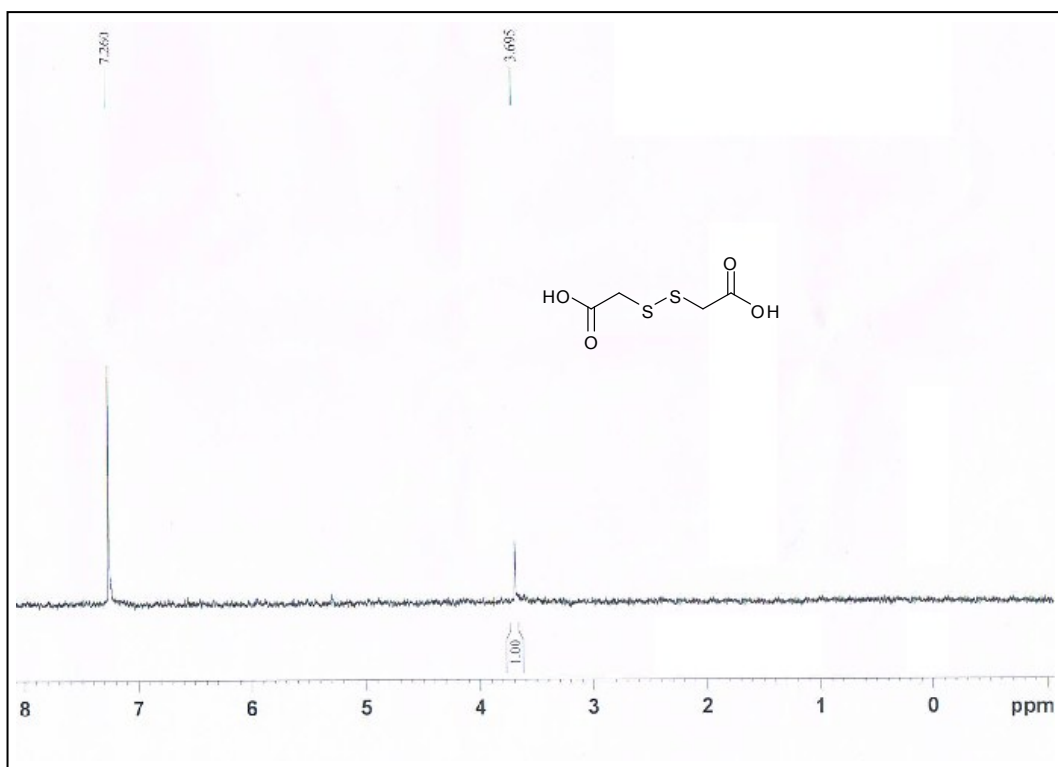

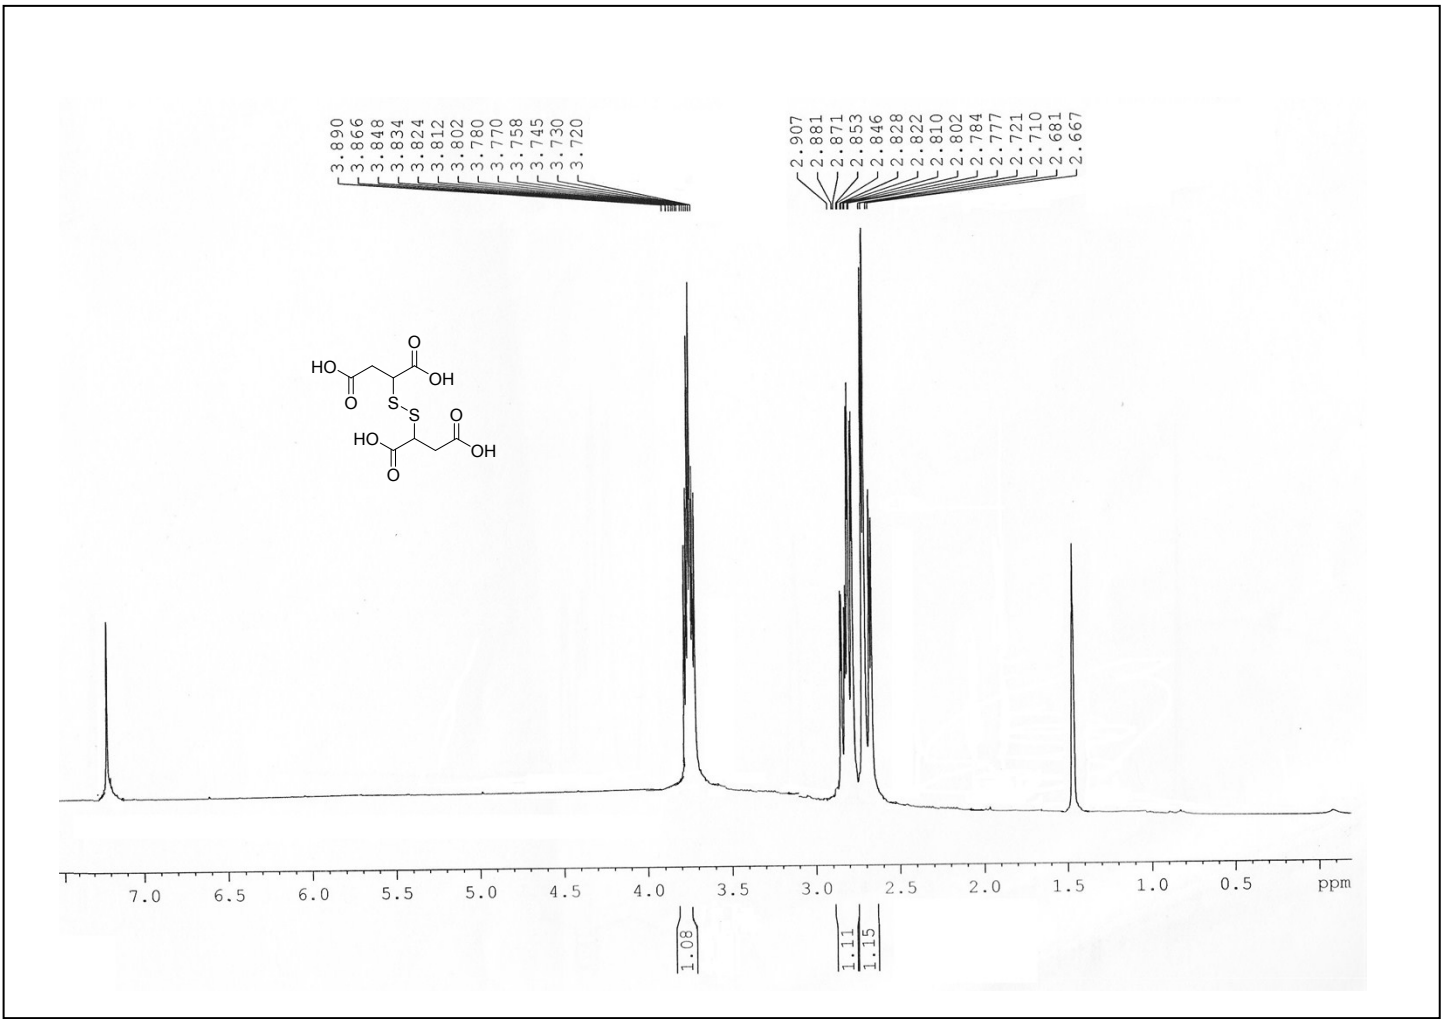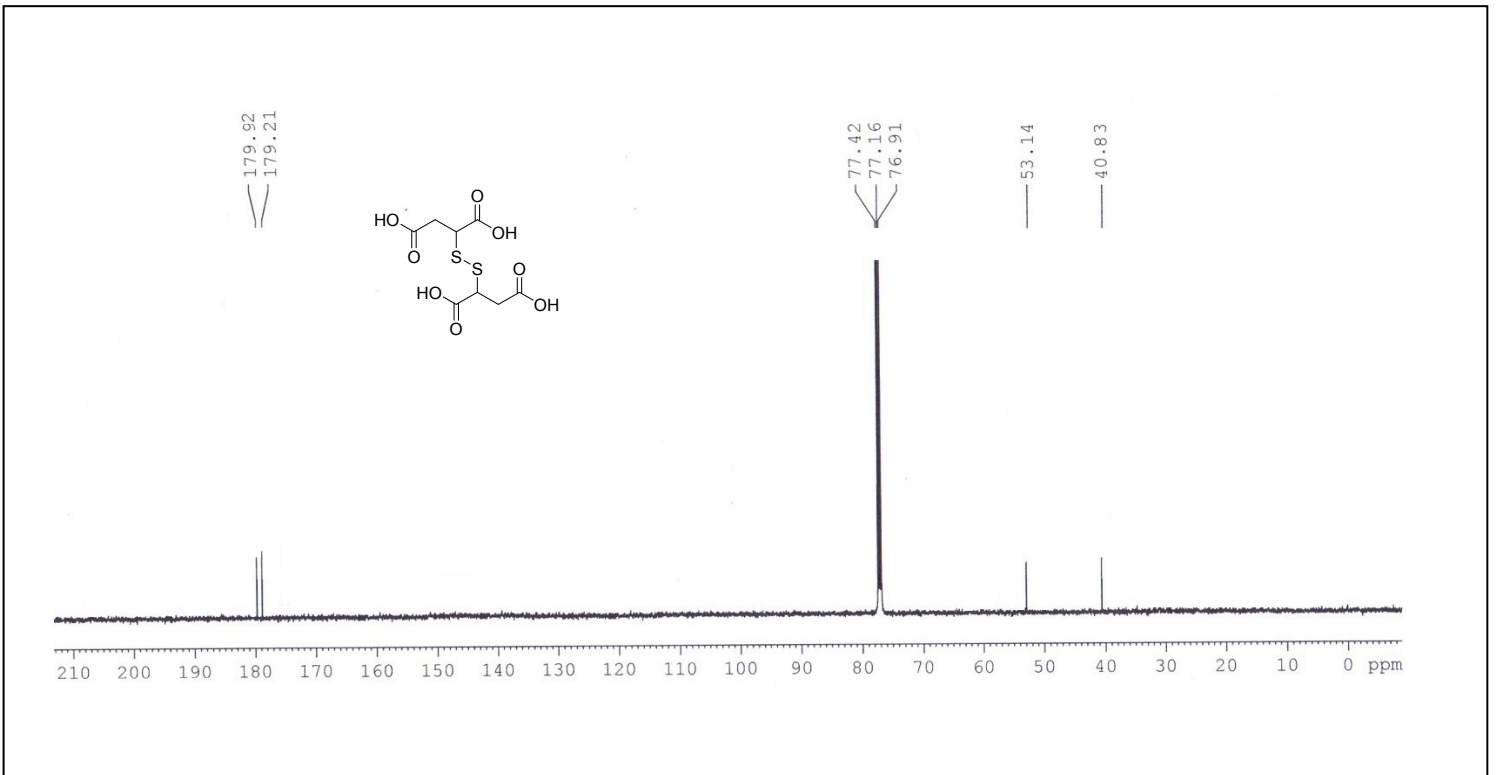

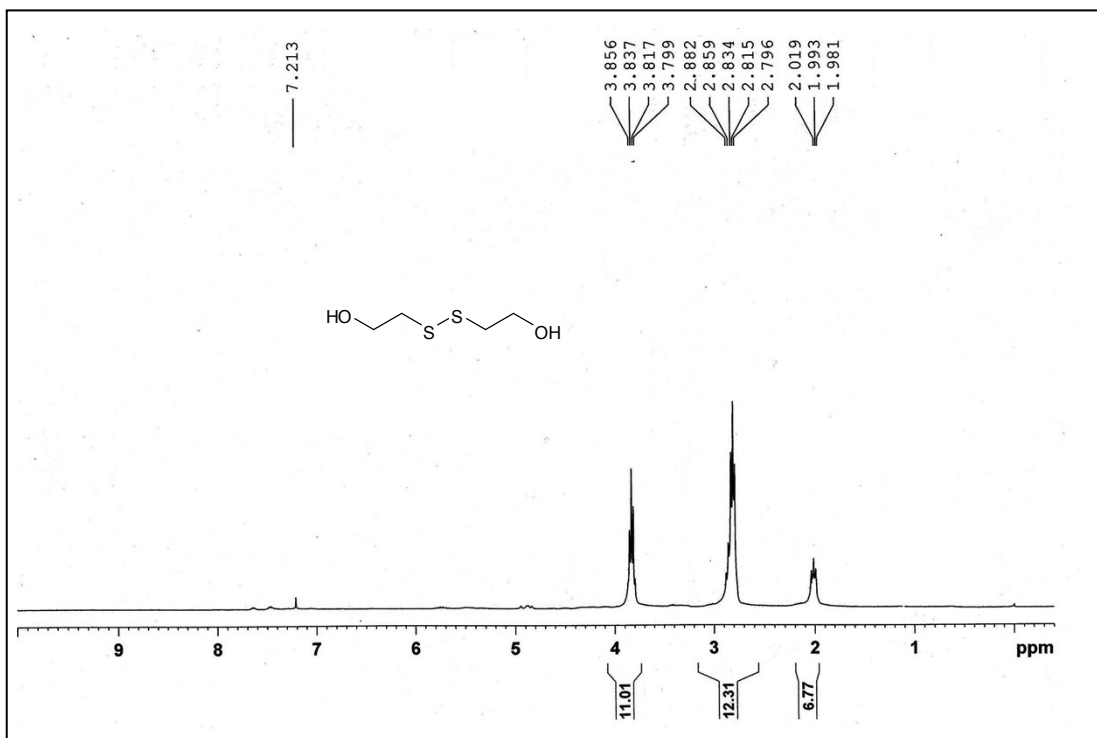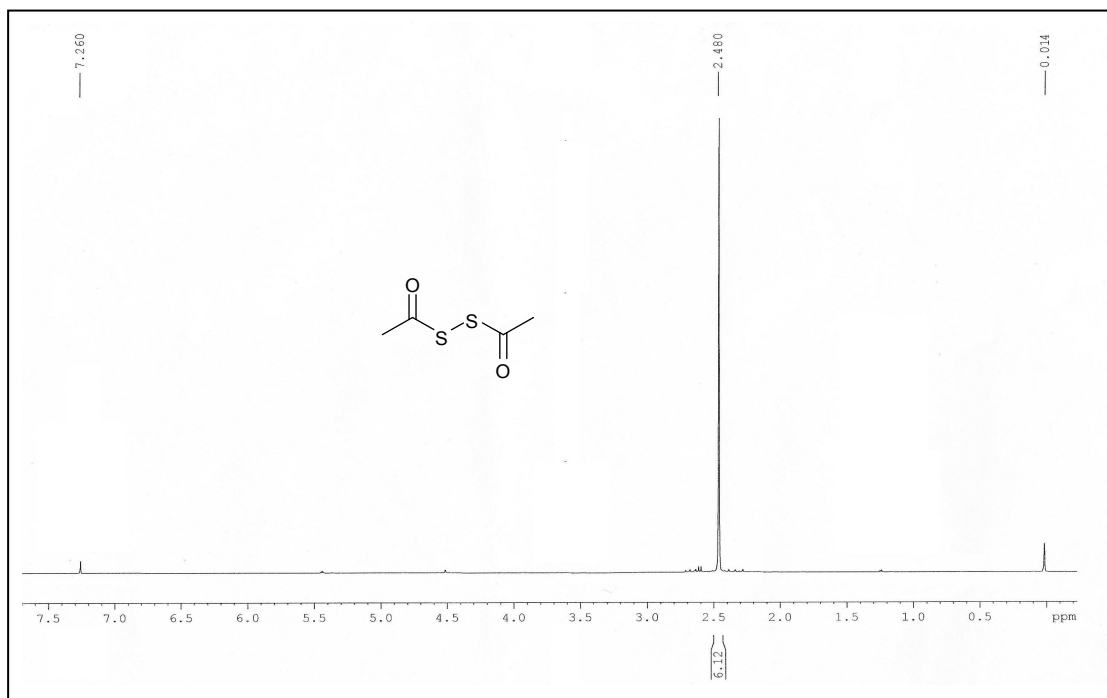

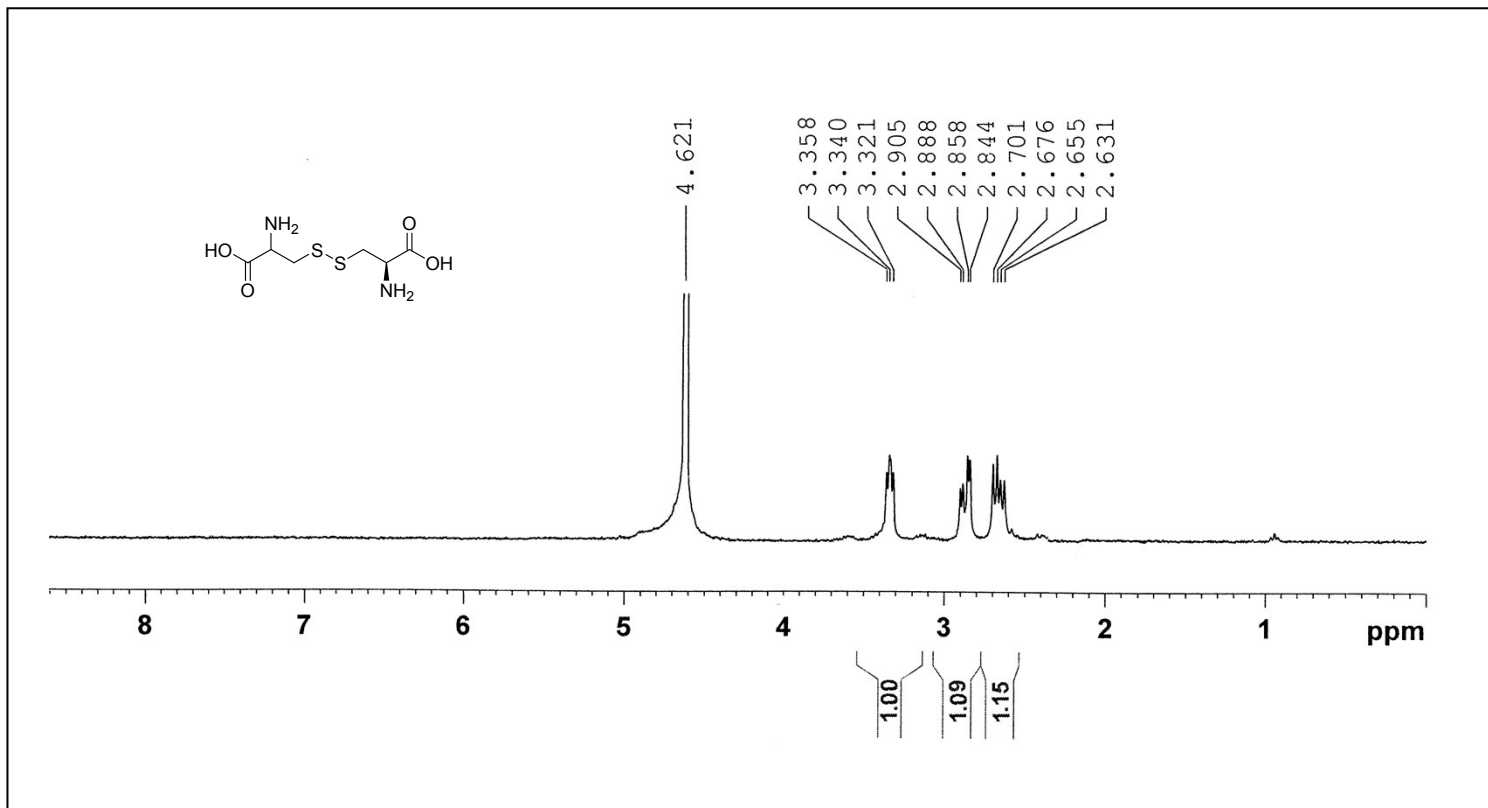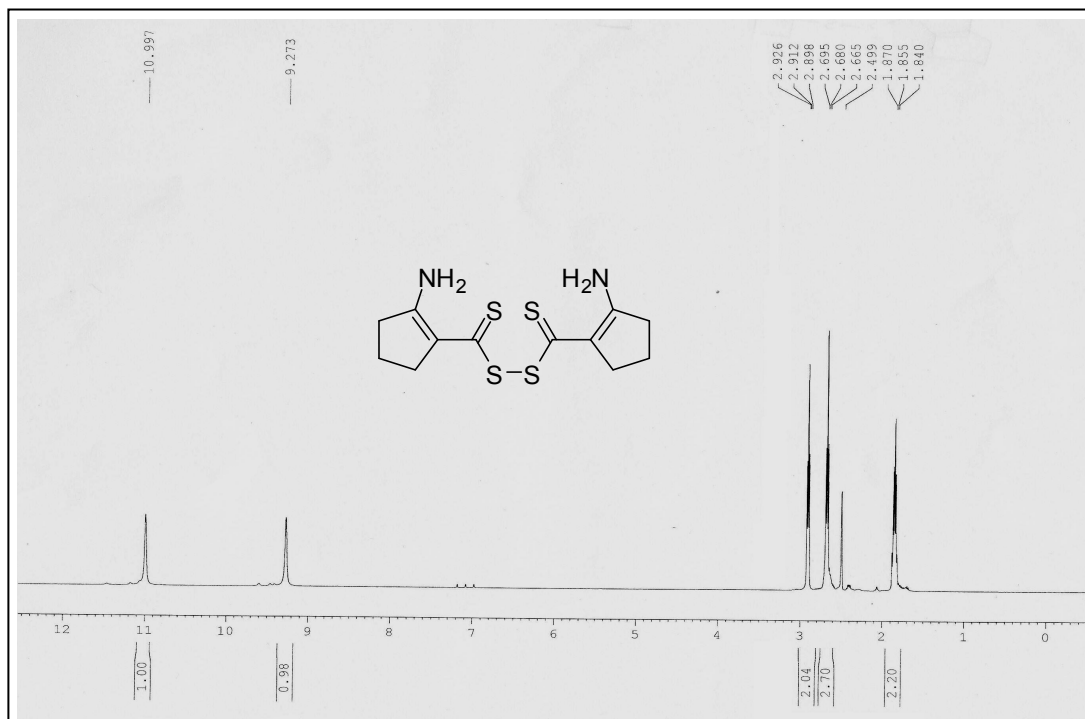

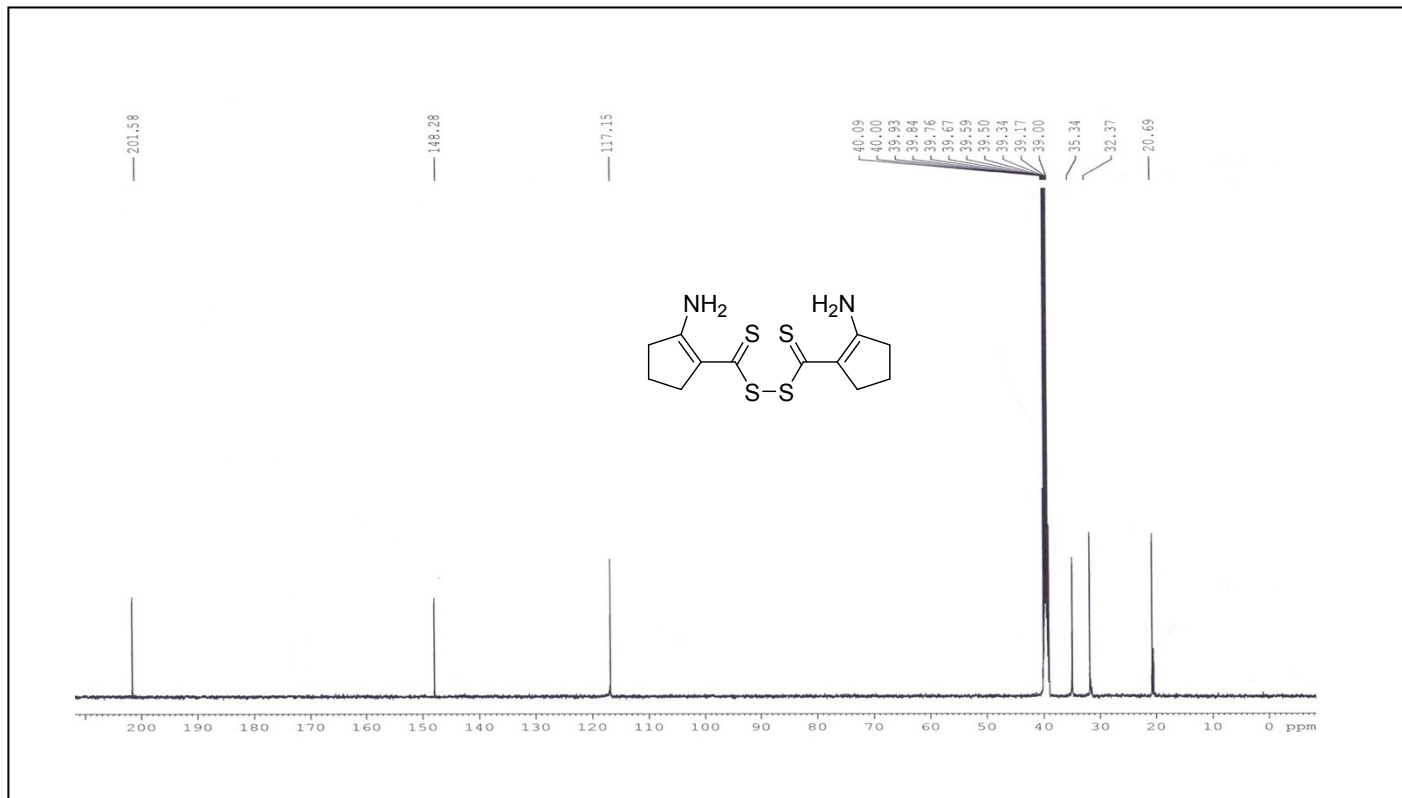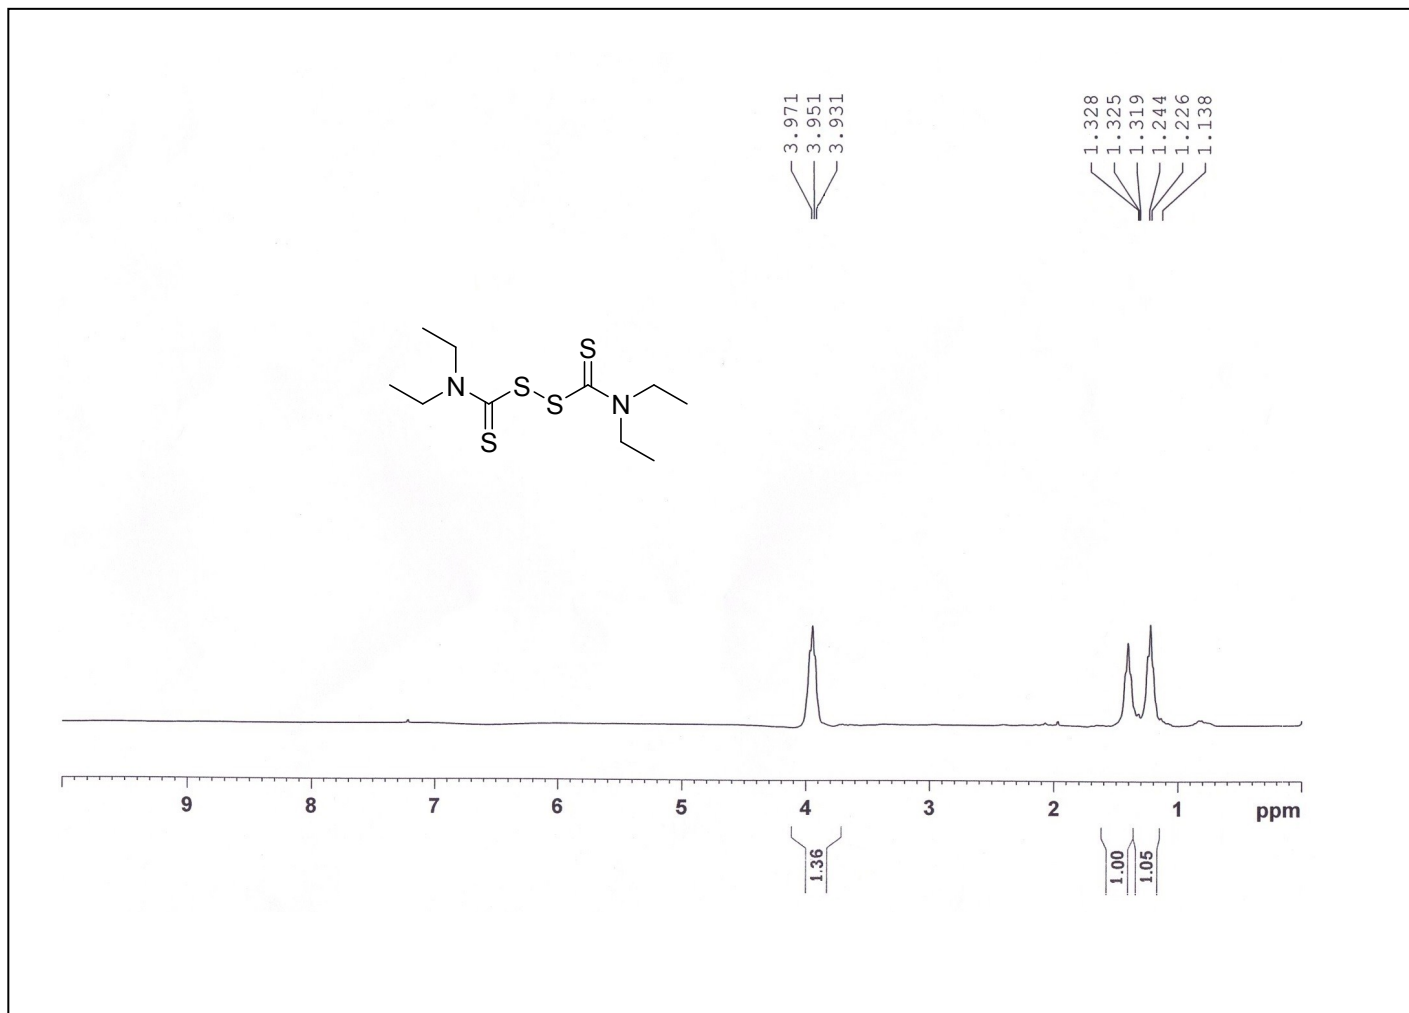



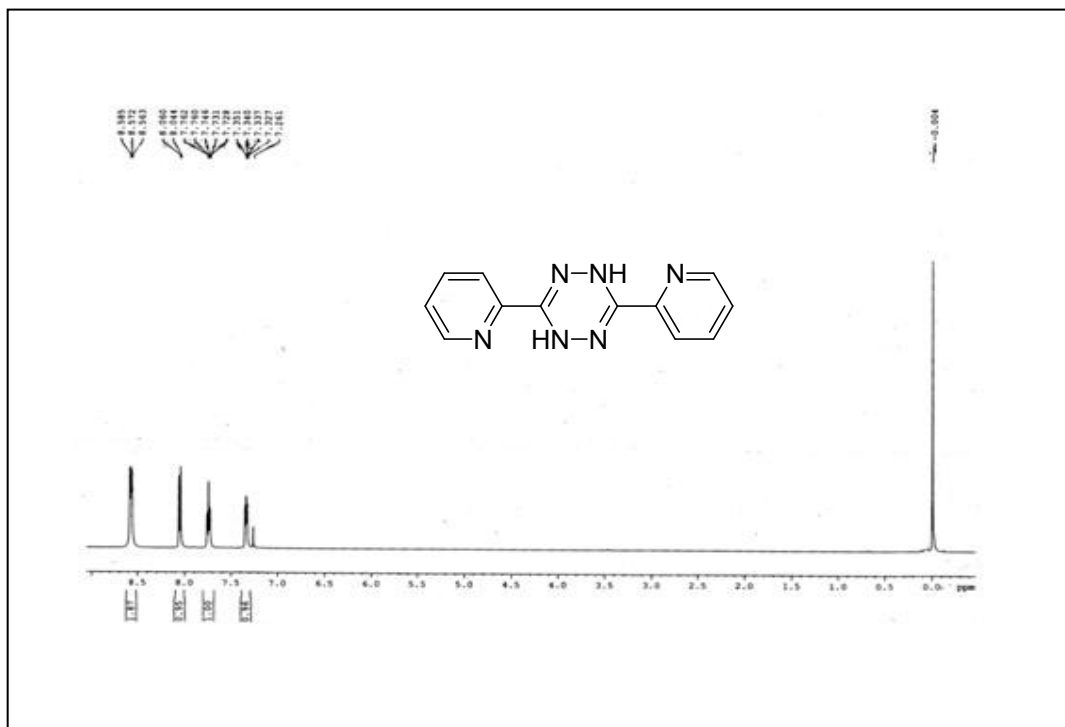

Supplement: c6ra01509c1.pdf [file c6ra01509c1.pdf]
